# Supplementary material for: Synchrony and motor mimicking in chimpanzee observational learning
Source: PubMed Central journal article supplement — Sci Rep. 2014 Jun 13;4:5283. doi: 10.1038/srep05283 (PMC5381545; doi:10.1038/srep05283), 2014-06-13
Supplement: srep05283-s1.pdf [file srep05283-s1.pdf]

**TITLE:** Synchrony and motor mimicking in chimpanzee observational learning

**AUTHORS:** Delia Fuhrmann<sup>1,2</sup>, Andrea Ravignani<sup>3</sup>, Sarah Marshall-Pescini<sup>1,4</sup> and Andrew Whiten<sup>1\*</sup>

**SUPPLEMENTARY INFORMATION**

**Supplementary Table 1. Details of videos, participants and coding procedure.** Abbreviations:

proximal interphalangeal joint of the hand (IPI); middle phalanx of the hand (MP).

|                                             | VIDEO 1                   | VIDEO 2                                  | VIDEO 3                        | VIDEO 4                                  | VIDEO 5       |
|---------------------------------------------|---------------------------|------------------------------------------|--------------------------------|------------------------------------------|---------------|
| <b>Model</b>                                |                           |                                          |                                |                                          |               |
| <i>Identity</i>                             | Mawa                      | Mawa                                     | Mawa                           | Experimenter                             | Experimenter  |
| <i>Body-part coded</i>                      | left 3rd IPI              | left 3rd IPI                             | left 3rd IPI                   | right 2rd IPI                            | right 3rd IPI |
| <i>Number of nut-cracking bouts</i>         | 1                         | 4                                        | 5                              | 3                                        | 1             |
| <i>Overall number of nut-cracking beats</i> | 11                        | 10                                       | 12                             | 13                                       | 7             |
| <i>Nut-cracking interruptions</i>           | None                      | Nut rolls away                           | Nut rolls away                 | Nut rolls away                           | None          |
| <b>Observer</b>                             |                           |                                          |                                |                                          |               |
| <i>Identity</i>                             | Baluku                    | Baluku                                   | Baluku                         | Baluku                                   | Baluku        |
| <i>Body part coded</i>                      | right 3rd IPI             | right 5th MP; piece of straw on the back | right 3rd IPI; right ear       | right 3rd IPI; right ear                 | right 3rd IPI |
| <i>Number of mimicry bouts</i>              | 1                         | 1                                        | 3                              | 2                                        | 1             |
| <i>Overall number of beats or sways</i>     | 8                         | 4                                        | 8                              | 7                                        | 5             |
| <i>Beats vs. sways</i>                      | All beats                 | Very 1st beat, rest hand not visible     | All beats apart from very last | 1st bout only sways, 2nd bout only beats | All beats     |
| <i>Observation interruptions</i>            | Stops to look at his foot | Pauses to scratch                        | Pauses to scratch              | Pauses to spin                           | None          |

**Supplementary Table 2. Results of Shapiro-Wilk (W) test of normality for interval durations.** P-

values below 0.05 indicate that the variable was not normally distributed. Abbreviations: V1-5

(Video 1 - 5), Model (M), Observer (O).

|           | V1(M) | V1(O) | V2(M) | V2(O) | V3(M) | V3(O) | V4(M)  | V4(O)  | V5(M) | V5(O) |
|-----------|-------|-------|-------|-------|-------|-------|--------|--------|-------|-------|
| <i>W</i>  | 0.757 | 0.793 | 0.872 | 0.850 | 0.829 | 0.905 | 0.747  | 0.724  | 0.773 | 0.858 |
| <i>df</i> | 9     | 7     | 15    | 12    | 15    | 21    | 18     | 17     | 6     | 6     |
| <i>p</i>  | 0.007 | 0.035 | 0.036 | 0.037 | 0.009 | 0.044 | <0.001 | <0.001 | 0.033 | 0.184 |

**Supplementary Table 3. Results of covariance stationarity analysis for original and differenced data used for the Monte Carlo permutation test.** For the ADF test 1 indicates that there is a unit root present, and the series is not covariance stationary (CS), while 0 indicates that there is no unit root present and the series is CS. The opposite is true for the KPSS test where 0 implies unit root and 1 implies no unit root at  $p < 0.05$ . Values are reported for both tests with 30 lags included.

Abbreviations: V1-5 (Video 1 - 5), Model (M), Observer (O).

| <b>Original Data</b>    |        |       |       |       |       |       |       |       |       |       |
|-------------------------|--------|-------|-------|-------|-------|-------|-------|-------|-------|-------|
|                         | V1 (M) | V1(O) | V2(M) | V2(O) | V3(M) | V3(O) | V4(M) | V4(O) | V5(M) | V5(O) |
| <i>ADF</i>              | 1      | 1     | 1     | 1     | 1     | 1     | 1     | 1     | 1     | 1     |
| <i>KPSS</i>             | 1      | 0     | 1     | 0     | 0     | 0     | 0     | 1     | 1     | 1     |
| <b>Differenced Data</b> |        |       |       |       |       |       |       |       |       |       |
|                         | V1 (M) | V1(O) | V2(M) | V2(O) | V3(M) | V3(O) | V4(M) | V4(O) | V5(M) | V5(O) |
| <i>ADF</i>              | 0      | 0     | 0     | 0     | 0     | 0     | 0     | 1     | 0     | 0     |
| <i>KPSS</i>             | 1      | 1     | 1     | 1     | 1     | 1     | 1     | 1     | 1     | 1     |

**Supplementary Video 1. Video 1 - Observer Baluku, model Mawa**

**Supplementary Video 2. Video 2 - Observer Baluku, model Mawa**

**Supplementary Video 3. Video 3 - Observer Baluku, model Mawa**

**Supplementary Video 4. Video 4 - Baluku, model experimenter**

**Supplementary Video 5. Video 5 - Baluku, model experimenter**
